# Supplementary material for: A difluoroboron compound with latent fingerprint detection and inkless writing based on aggregation-induced emission enhancement and mechanofluorochromic behavior
Source: Royal Society of Chemistry journal article supplement (doi:10.1039/d3nj04954j), 2023-12-08
Supplement: d3nj04954j1.pdf [file d3nj04954j1.pdf]

## A difluoroboron compound with latent fingerprint detection and inkless writing based on aggregation-induced emission enhancement and mechanofluorochromic behavior

Shufan Yang<sup>1,a</sup>, Jiazhuang Tian<sup>1,a</sup>, Bangcui Zhang<sup>a</sup>, Yanhua Yang<sup>a\*</sup>, Xiangguang Li<sup>a\*\*</sup>, Shulin Gao<sup>a\*\*\*</sup>,

Lin Shao<sup>b</sup>, Fumin Li<sup>c\*\*\*\*</sup>

<sup>a</sup> School of Chemistry and Chemical Engineering, Kunming University, Kunming, 650214, P. R. China.

<sup>b</sup> Chromatographic Analysis Center, Dali Institute for Food Control, Dali, 671000, P. R. China.

<sup>c</sup> Physical and Chemical Inspection Center, Dali Institute for Food Control, Dali, 671000, P. R. China.

### Content

|                   |           |                                                                                                            |   |
|-------------------|-----------|------------------------------------------------------------------------------------------------------------|---|
| <b>Figure</b>     | <b>S1</b> | NMR spectra.....                                                                                           | 2 |
| <b>Figure</b>     | <b>S2</b> | HRMS.....                                                                                                  | 3 |
| <b>Figure S3</b>  |           | FTIR.....                                                                                                  | 3 |
| <b>Figure S4</b>  |           | Lippert-Mataga plot.....                                                                                   | 4 |
| <b>Figure</b>     | <b>S5</b> | Absorption spectra in THF and H <sub>2</sub> O mixtures.....                                               | 4 |
| <b>Figure S6</b>  |           | SEM images of TPA-Py-Br BF <sub>2</sub> in THF/H <sub>2</sub> O mixture ( <i>f<sub>w</sub></i> = 80%)..... | 4 |
| <b>Figure S7</b>  |           | DSC curves of before and after grinding.....                                                               | 5 |
| <b>Figure S8</b>  |           | $\tau$ of before and after grinding.....                                                                   | 5 |
| <b>Figure S9</b>  |           | $\Phi_f$ of before and after grinding.....                                                                 | 6 |
| <b>Figure S10</b> |           | Normalized emission spectra of before and after grinding, and after heating.....                           | 6 |
| <b>Figure S11</b> |           | The emission wavelength upon treated by grinding-fuming repeatedly.....                                    | 7 |
| <b>Figure S12</b> |           | The molecular conformation in front view and unit cell in single crystal.....                              | 7 |
| <b>Table</b>      | <b>S1</b> | Photophysical data in various organic solvents.....                                                        | 8 |
| <b>Table S2.</b>  |           | Crystal data and structure refinement.....                                                                 | 9 |

\* Correspond author, E-mail address: yh\_yangkmu@126.com (Y. Yang)

276090212@qq.com (X. Li)

778144294@qq.com (S. Gao)

810944654@qq.com (F. Li)

<sup>1</sup> The authors contribute equally to this paper.

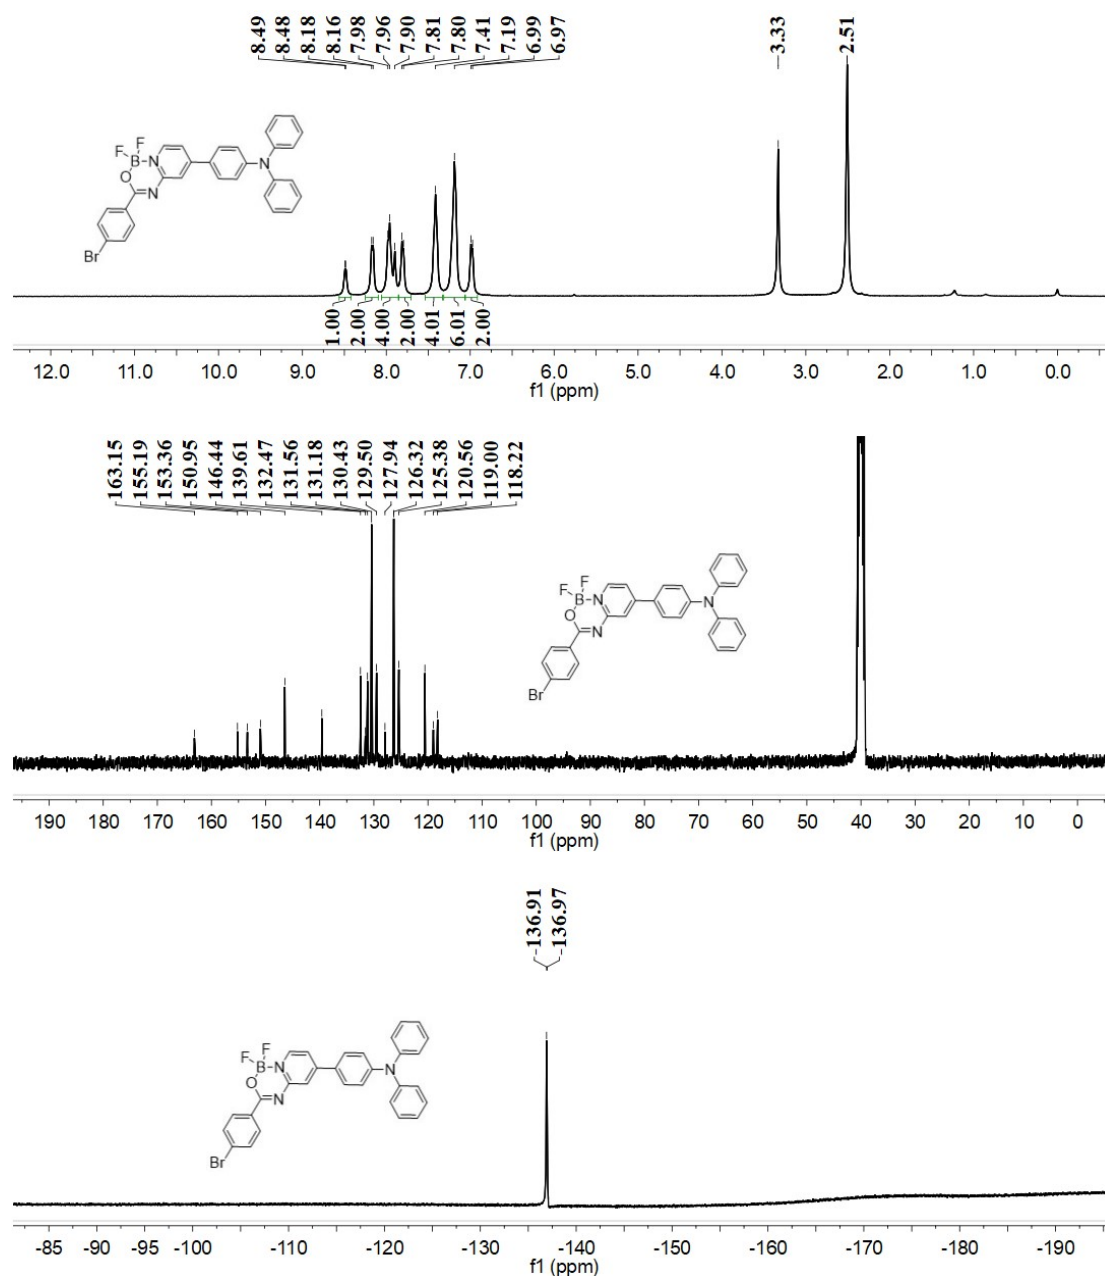

Figure S1 <sup>1</sup>H NMR, <sup>13</sup>C NMR and <sup>19</sup>F NMR spectra of TPA-Py-Br BF<sub>2</sub> in DMSO-d<sub>6</sub>.

### User Spectra

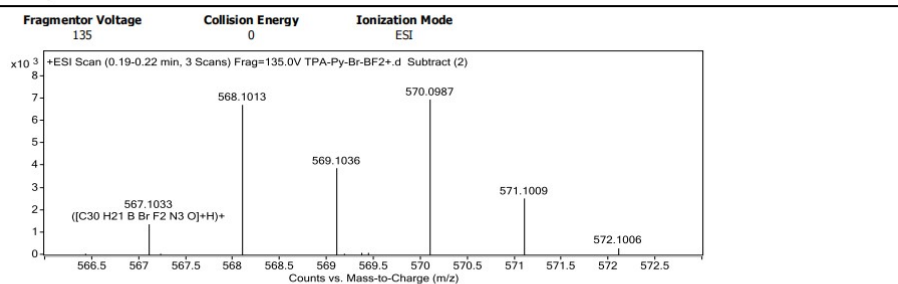

#### Peak List

| m/z       | z | Abund   |
|-----------|---|---------|
| 568.1013  | 1 | 6742.59 |
| 569.1036  | 1 | 3881.47 |
| 570.0987  | 1 | 6971.85 |
| 571.1009  | 1 | 2529.42 |
| 1137.1905 | 1 | 2929.7  |
| 1138.1929 | 1 | 2062.52 |
| 1139.1909 | 1 | 1867.06 |
| 1159.1737 | 1 | 2344.03 |
| 1175.1489 | 1 | 1860.57 |
| 1176.1481 | 1 | 1679.35 |

#### Formula Calculator Element Limits

| Element | Min | Max |
|---------|-----|-----|
| C       | 3   | 60  |
| H       | 0   | 50  |
| O       | 0   | 5   |
| Br      | 0   | 2   |
| N       | 0   | 5   |
| F       | 0   | 3   |
| B       | 1   | 1   |

#### Formula Calculator Results

| Formula                                                           | CalculatedMass | CalculatedMz | Mz       | Diff. (mDa) | Diff. (ppm) | DBE     |
|-------------------------------------------------------------------|----------------|--------------|----------|-------------|-------------|---------|
| C <sub>30</sub> H <sub>21</sub> BrF <sub>2</sub> N <sub>3</sub> O | 566.0965       | 567.1038     | 567.1033 | 0.5         | 0.8         | 21.0000 |

Figure S2 HRMS of TPA-Py-Br BF<sub>2</sub>.

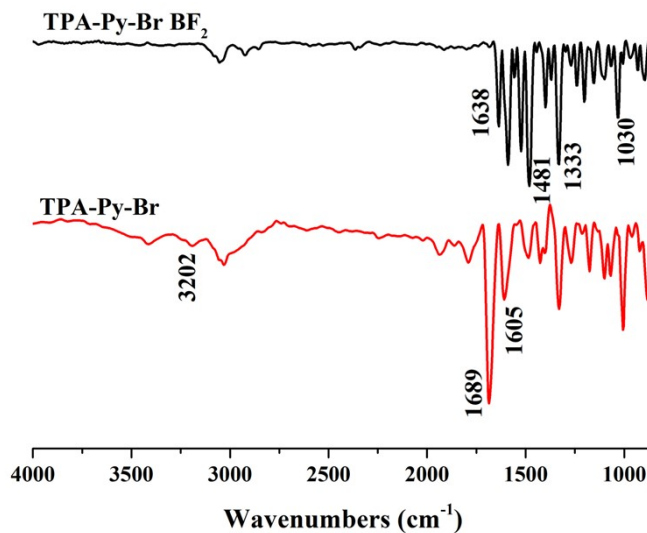

Figure S3 FTIR of TPA-Py-Br and TPA-Py-Br BF<sub>2</sub>.

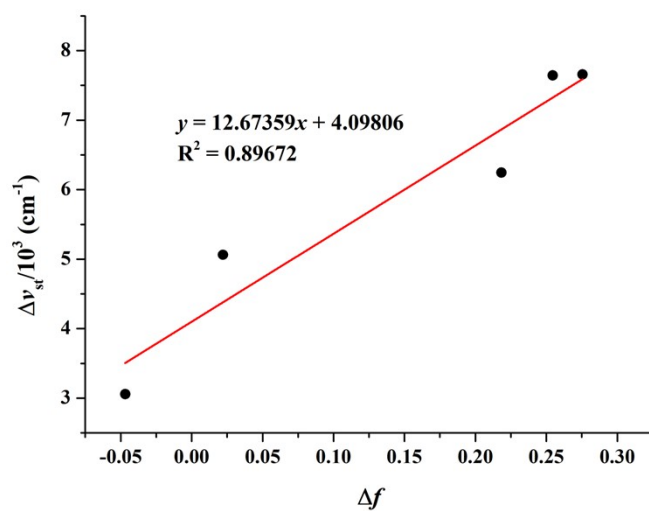

**Figure S4** Lippert-Mataga plot of TPA-Py-Br BF<sub>2</sub> in different solvents.

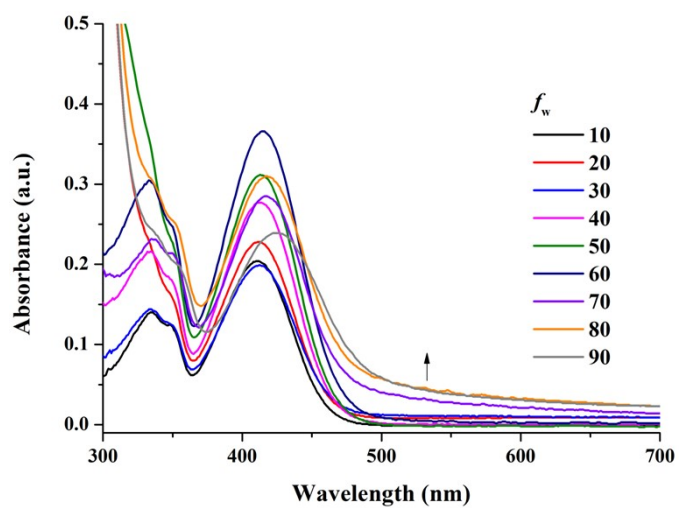

**Figure S5** Absorption spectra of TPA-Py-Br BF<sub>2</sub> in THF and H<sub>2</sub>O mixtures ( $c = 1.0 \times 10^{-5}$  mol/L)

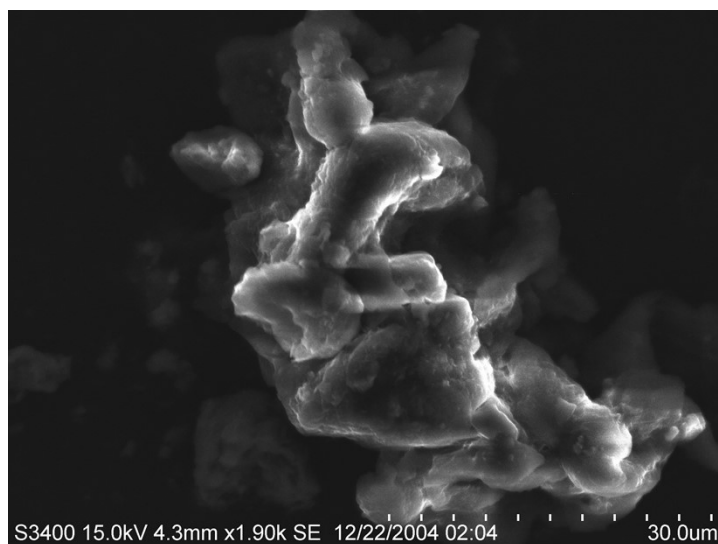

**Figure S6** SEM images of TPA-Py-Br BF<sub>2</sub> in THF/H<sub>2</sub>O mixture ( $f_w = 80\%$ )

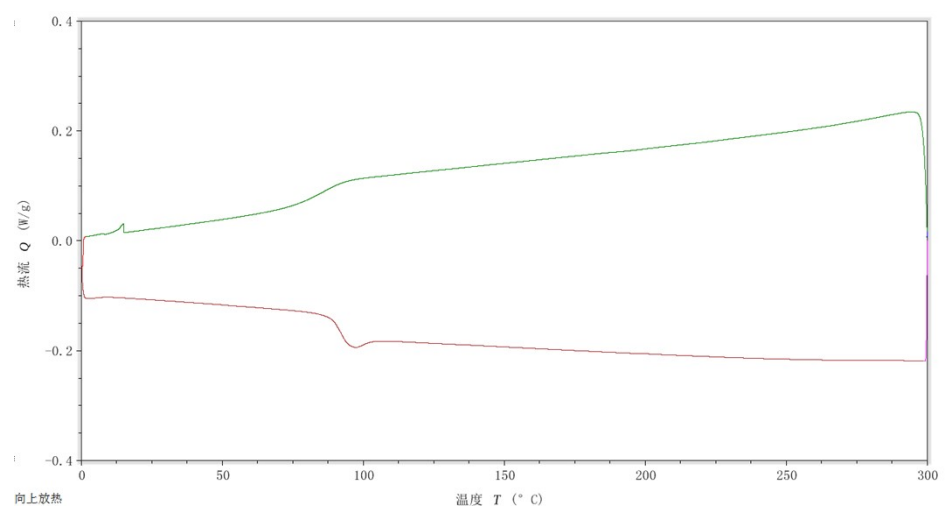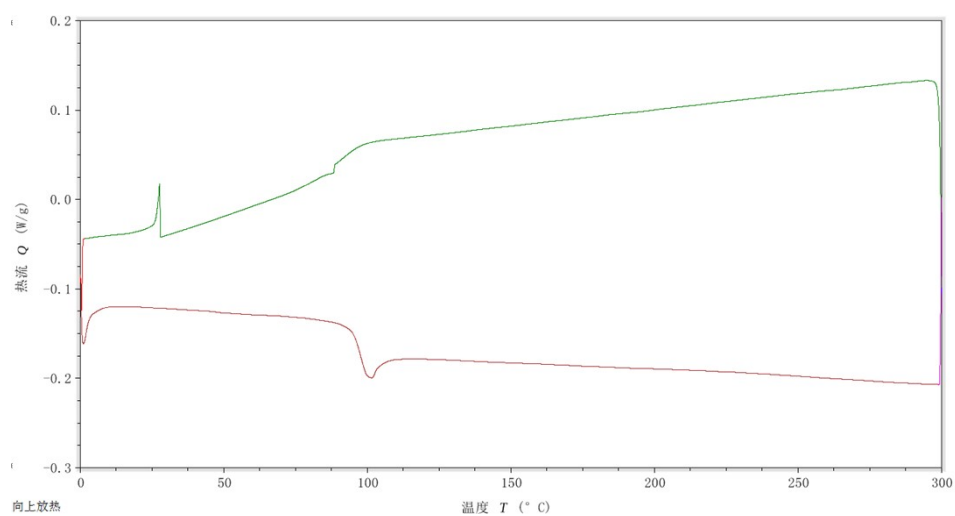

**Figure S7** DSC curves of TPA-Py-Br BF<sub>2</sub> before (up) and after grinding (down), respectively.

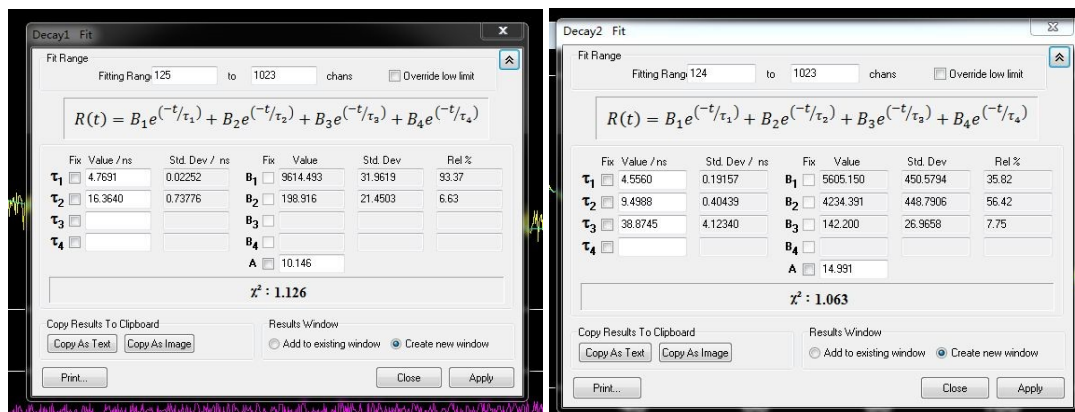

Figure S8  $\tau$  of TPA-Py-Br  $\text{BF}_2$  before (up) and after grinding (down), respectively.

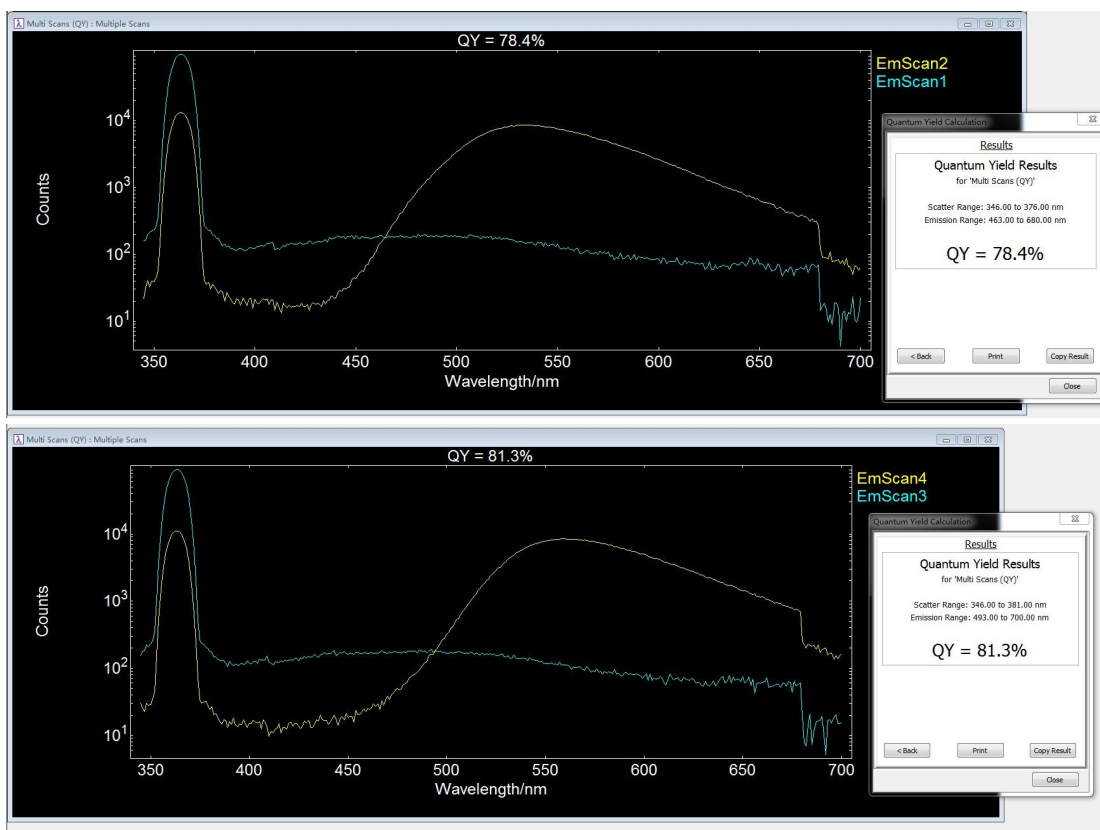

Figure S9  $\Phi_f$  of TPA-Py-Br  $\text{BF}_2$  before (up) and after grinding (down), respectively.

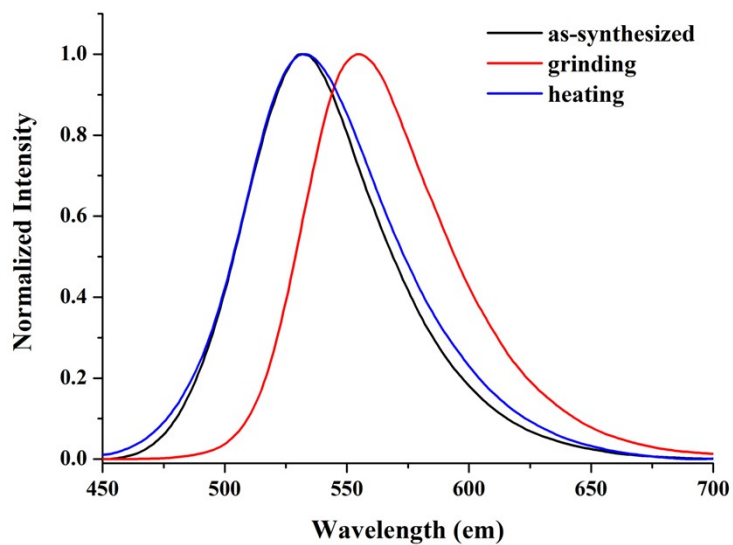

**Figure S10** Normalized emission spectra ( $\lambda_{\text{ex}} = 365 \text{ nm}$ ) of **TPA-Py-Br BF<sub>2</sub>** before and after grinding, and after heating, respectively.

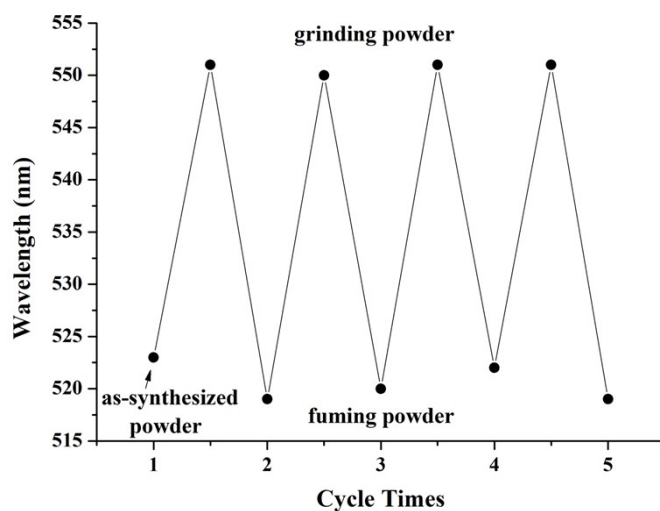

**Figure S11** The emission wavelength of **TPA-Py-Br BF<sub>2</sub>** upon treated by grinding and fuming with  $\text{CH}_2\text{Cl}_2$  repeatedly.

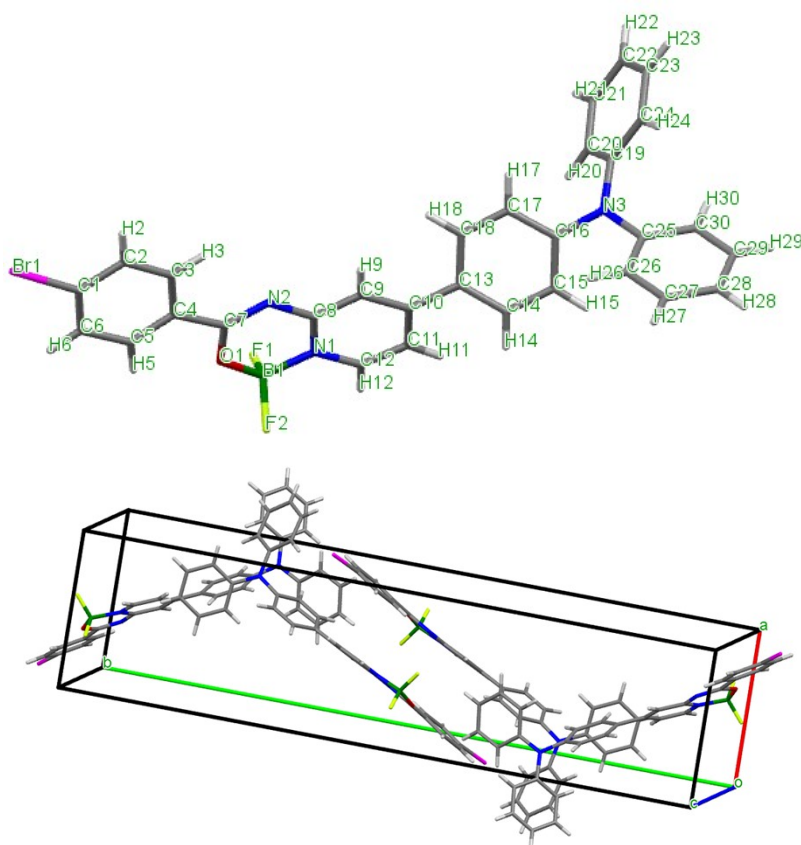

**Figure S12** The molecular conformation of **TPA-Py-Br BF<sub>2</sub>** in front view and unit cell in single crystal.

**Table S1** Photophysical data of compound **TPA-Py-Br BF<sub>2</sub>** in various organic solvents

| Compound                        | Solvents                        | $\Delta f^a$ | $\lambda_{\text{abs}}/\text{nm}$ | $\lambda_{\text{em}}/\text{nm}$ | $\Delta v_{\text{st}}^b/10^3 \text{ cm}^{-1}$ |
|---------------------------------|---------------------------------|--------------|----------------------------------|---------------------------------|-----------------------------------------------|
| <b>TPA-Py-Br BF<sub>2</sub></b> | <i>n</i> -hexane                | -0.0468      | 274, 331, 345, 401               | 457                             | 3.057                                         |
|                                 | PhCl                            | 0.0222       | 337, 416                         | 527                             | 5.063                                         |
|                                 | CH <sub>2</sub> Cl <sub>2</sub> | 0.2185       | 272, 335, 415                    | 562                             | 6.044                                         |
|                                 | DMF                             | 0.2756       | 334, 413                         | 604                             | 7.657                                         |
|                                 | DMSO                            | 0.2545       | 273, 336, 416                    | 610                             | 7.645                                         |

<sup>a</sup>  $\Delta f$  referred to solvent polarity parameters, it was calculated as follows:



$$\Delta f = \frac{\varepsilon - 1}{2\varepsilon + 1} - \frac{n^2 - 1}{2n^2 + 1}$$

where  $\varepsilon$  was the static dielectric constant,  $n$  was the optical refractive index of the solvent.

$$^b \Delta v_{\text{st}} = \Delta v_{\text{abs}} - \Delta v_{\text{em}}$$

**Table S2.** Crystal data and structure refinement for **TPA-Py-Br BF<sub>2</sub>**.

|                       |                                                                    |
|-----------------------|--------------------------------------------------------------------|
| Identification code   | cu_20230614_YS_KMXY_SF_4_0m                                        |
| Empirical formula     | C <sub>30</sub> H <sub>21</sub> BBrF <sub>2</sub> N <sub>3</sub> O |
| Formula weight        | 568.22                                                             |
| Temperature/K         | 193.00                                                             |
| Crystal system        | monoclinic                                                         |
| Space group           | P2 <sub>1</sub> /c                                                 |
| a/Å                   | 8.2149(4)                                                          |
| b/Å                   | 33.6377(13)                                                        |
| c/Å                   | 9.9837(4)                                                          |
| α/°                   | 90                                                                 |
| β/°                   | 90.872(3)                                                          |
| γ/°                   | 90                                                                 |
| Volume/Å <sup>3</sup> | 2758.5(2)                                                          |
| Z                     | 4                                                                  |

|                                                |                                                               |
|------------------------------------------------|---------------------------------------------------------------|
| $\rho_{\text{calc}}/\text{cm}^3$               | 1.368                                                         |
| $\mu/\text{mm}^{-1}$                           | 2.374                                                         |
| F(000)                                         | 1152.0                                                        |
| Crystal size/ $\text{mm}^3$                    | $0.13 \times 0.11 \times 0.1$                                 |
| Radiation                                      | CuK $\alpha$ ( $\lambda = 1.54178$ )                          |
| 2 $\theta$ range for data collection/ $^\circ$ | 9.24 to 136.414                                               |
| Index ranges                                   | $-9 \leq h \leq 9, -39 \leq k \leq 39, -12 \leq l \leq 12$    |
| Reflections collected                          | 26871                                                         |
| Independent reflections                        | 4979 [ $R_{\text{int}} = 0.0775, R_{\text{sigma}} = 0.0623$ ] |
| Data/restraints/parameters                     | 4979/75/438                                                   |
| Goodness-of-fit on $F^2$                       | 1.090                                                         |
| Final R indexes [ $ I  \geq 2\sigma(I)$ ]      | $R_1 = 0.0791, wR_2 = 0.1822$                                 |
| Final R indexes [all data]                     | $R_1 = 0.1121, wR_2 = 0.2004$                                 |
| Largest diff. peak/hole / $e \text{ \AA}^{-3}$ | 0.42/-0.34                                                    |

## Theoretical calculations

Quantum chemical calculation results were studied from the density functional theory (DFT) using B3LYP/6-31G(d) and TD-CAM-B3LYP/6-31G(d) level for the ground and excited states<sup>[1]</sup>, respectively, through the Gaussian 09 program package<sup>[2]</sup>, and the frontier molecular orbital and electrostatic potential (ESP) surface were obtained by Multiwfn 3.8(dev)<sup>[3,4]</sup> and visual molecular dynamic (VMD) software<sup>[5]</sup>, respectively.

### References

- [1] Yanai T, Tew D P, Handy N C. A new hybrid exchange–correlation functional using the Coulomb-attenuating method (CAM-B3LYP) [J]. Chemical physics letters, 2004, 393(1-3): 51-57.
- [2] Frisch M J, Trucks G W, Schlegel H B, Scuseria G E, Robb M A, Cheeseman J R, Scalmani G, Barone V, Petersson G A, Nakatsuji H, Li X, Caricato M, Marenich A V, Bloino J, Janesko B G, Gomperts R, Mennucci B, Hratchian H P, Ortiz J V, Izmaylov A F, Sonnenberg J L, Williams, Ding F, Lipparini F, Egidi F, Goings J, Peng B, Petrone A, Henderson T, Ranasinghe D, Zakrzewski V G, Gao J, Rega N, Zheng G, Liang W, Hada M, Ehara M, Toyota K, Fukuda R, Hasegawa J, Ishida M, Nakajima T, Honda Y, Kitao O, Nakai H, Vreven T, Throssell K, Montgomery Jr. J A, Peralta J E, Ogliaro F, Bearpark M J, Heyd J J, Brothers E N, Kudin K N, Staroverov V N, Keith T A, Kobayashi R, Normand J, Raghavachari K, Rendell A

P, Burant J C, Iyengar S S, Tomasi J, Cossi M, Millam J M, Klene M, Adamo C, Cammi R, Ochterski J W, Martin R L, Morokuma K, Farkas O, Foresman J B, Fox D J. Gaussian 16 Rev. A.03 [M]. Wallingford, CT; Gaussian, Inc. 2016.

[3] Zhang J, Lu T. Efficient evaluation of electrostatic potential with computerized optimized code [J]. *Physical Chemistry Chemical Physics*, 2021, 23(36): 20323-20328.

[4] Lu T, Chen F. Multiwfn: a multifunctional wavefunction analyzer [J]. *Journal of computational chemistry*, 2012, 33(5): 580-592.

[5] Humphrey W, Dalke A, Schulten K. VMD: visual molecular dynamics [J]. *Journal of molecular graphics*, 1996, 14(1): 33-38.
